# Supplementary material
Source: publisher figshare collection journal article supplement (https://acs.figshare.com/ndownloader/files/11484029)
Supplement: Supplementary file 1 [file 11484029]

## SUPPORTING INFORMATION

### **Highly Stable Graphene-Based Nanocomposite (GO–PEI–Ag) with Broad-Spectrum, Long-Term Antimicrobial Activity and Antibiofilm Effects**

*Rongtao Zhao,<sup>†,//</sup> Wen Kong,<sup>†,‡,//</sup> Mingxuan Sun,<sup>†</sup> Yi Yang,<sup>†</sup> Wanying Liu,<sup>†</sup> Min Lv,<sup>§</sup> Shiping Song,<sup>§</sup> Lihua Wang,<sup>§</sup> Hongbin Song,<sup>\*,†</sup> and Rongzhang Hao<sup>\*,†</sup>*

<sup>†</sup>Institute of Disease Control and Prevention, PLA, Beijing 100071, P. R. China.

<sup>‡</sup>Guangxi Medical University, Nanning 530021, Guangxi, P. R. China.

<sup>§</sup>Division of Physical Biology & Bioimaging Center, Shanghai Institute of Applied Physics, Chinese Academy of Sciences, Shanghai 201800, P. R. China.

<sup>//</sup>R. Z. and W.K. contributed equally to this work.

#### **Corresponding Author**

\*E-mail: hrongzhang@163.com; hongbinsong@263.net

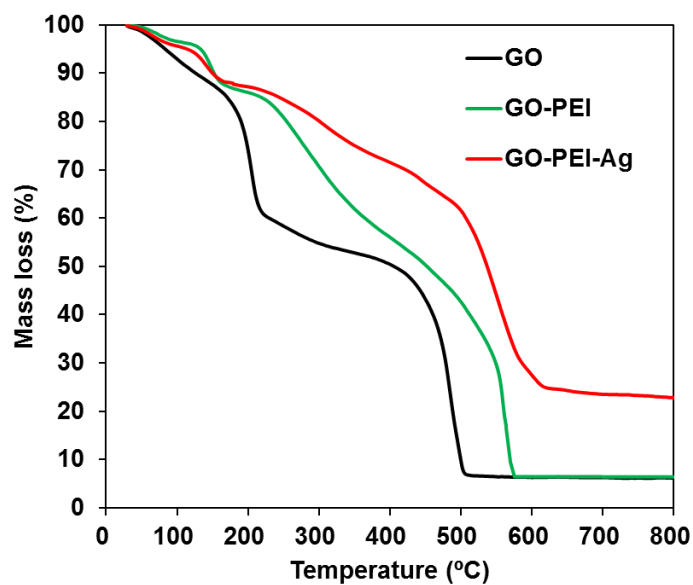

**Figure S1.** Thermalgravimetric curves of GO, GO-PEI, and GO-PEI-Ag.

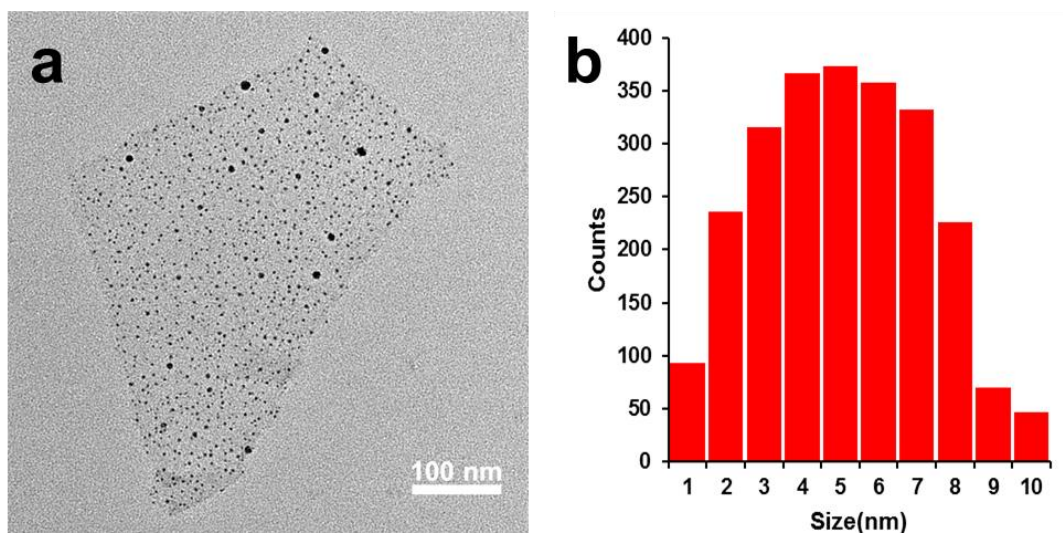

**Figure S2.** (a) Transmission electron microscopic (TEM) image of GO-Ag. (b) Size distribution of AgNPs on GO-Ag.

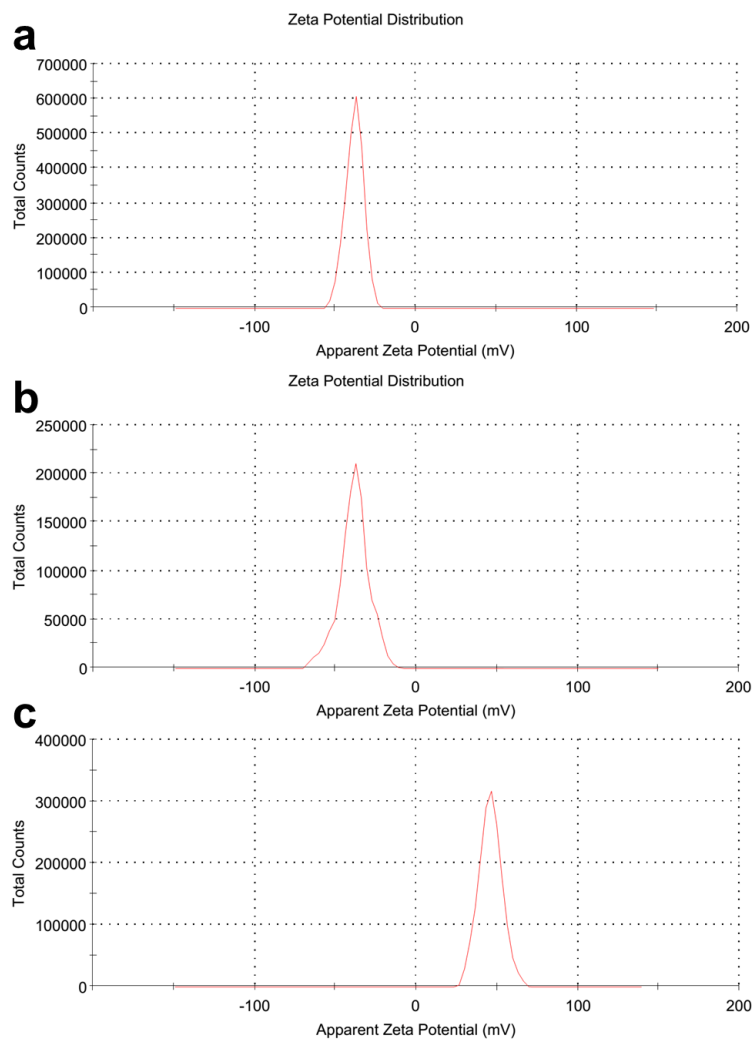

**Figure S3.** Zeta potential distributions of **(a)** GO, **(b)** GO-Ag, and **(c)** GO-PEI-Ag.

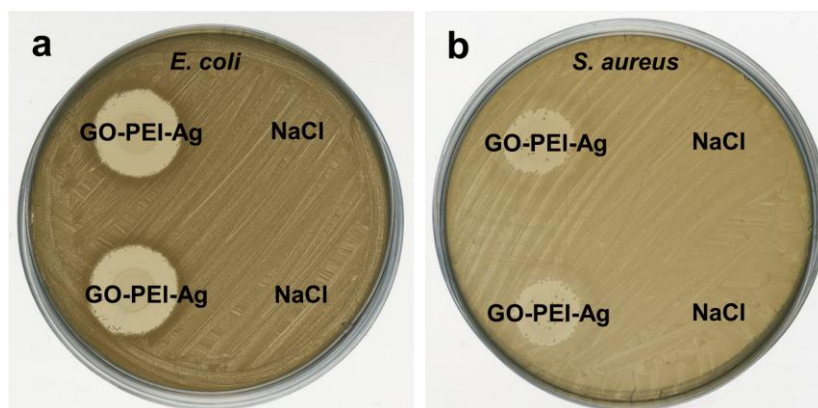

**Figure S4.** Digital Inhibition halos of **(a)** *E. coli* and **(b)** *S. aureus*, resulting from GO-PEI-Ag compared with NaCl.

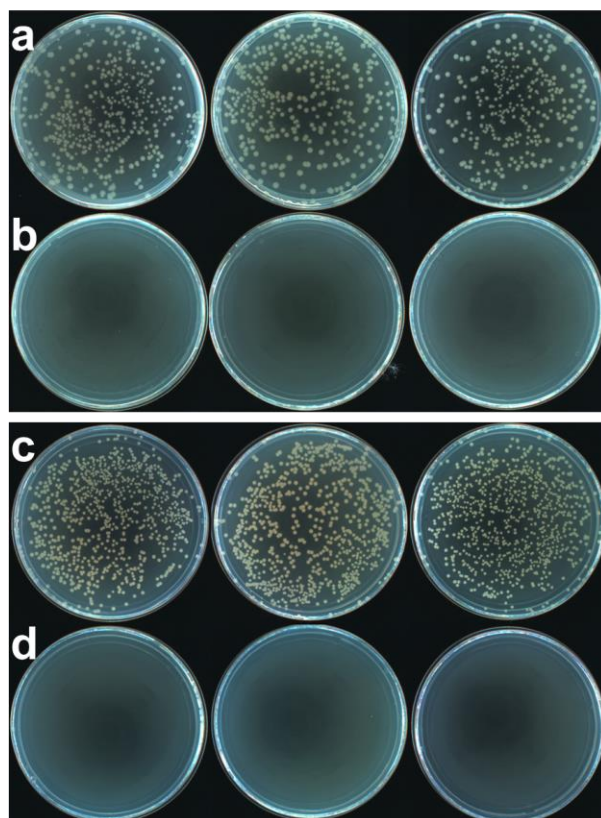

**Figure S5.** Digital images of bacterial colonies on LB plates after *E. coli* and *S. aureus* inoculated in LB medium containing 0  $\mu\text{g/ml}$  and 10  $\mu\text{g/mL}$  of GO-PEI-Ag for 1 week. **(a)** *E. coli* control group and **(b)** *E. coli* cultured with GO-PEI-Ag; **(c)** *S. aureus* control group and **(d)** *S. aureus* cultured with GO-PEI-Ag.

**Table S1.** The required duration for a certain survival rate of *E. coli* treated with different concentrations of GO-PEI-Ag.

| GO-PEI-Ag<br>concentration | Time to a certain survival rate of <i>E. coli</i> |         |         |
|----------------------------|---------------------------------------------------|---------|---------|
|                            | 50%                                               | 10%     | 1%      |
| 2 $\mu\text{g/mL}$         | 0.5-1 h                                           | 3-3.5 h | —       |
| 5 $\mu\text{g/mL}$         | < 0.5 h                                           | 0.5-1 h | 1.5-2 h |
| 10 $\mu\text{g/mL}$        | < 0.5 h                                           | < 0.5 h | 0.5-1 h |
| 20 $\mu\text{g/mL}$        | < 0.5 h                                           | < 0.5 h | < 0.5 h |

The “—” represents the corresponding concentration of GO-PEI-Ag cannot reduce the survival rate of *E. coli* to the certain value.

**Table S2.** The required duration for a certain survival rate of *S. aureus* treated with different concentrations of GO-PEI-Ag.

| GO-PEI-Ag<br>concentration | Time to a certain survival rate of <i>S. aureus</i> |         |         |
|----------------------------|-----------------------------------------------------|---------|---------|
|                            | 50%                                                 | 10%     | 1%      |
| 2 µg/mL                    | 2-2.5 h                                             | —       | —       |
| 5 µg/mL                    | 1-1.5 h                                             | 2-2.5 h | —       |
| 10 µg/mL                   | < 0.5 h                                             | 1-1.5 h | 2-2.5 h |
| 20 µg/mL                   | < 0.5 h                                             | 0.5-1 h | 0.5-1 h |

The “—” represents the corresponding concentration of GO-PEI-Ag cannot reduce the survival rate of *S. aureus* to the certain value.
